# Supplementary material for: Effects of Three Interventions Combining Impact or Walking at Intense Pace Training, with or without Calcium and Vitamin Supplements, to Manage Postmenopausal Women with Osteopenia and Osteoporosis
Source: MDPI journal article supplement (doi:10.3390/ijerph191811215), 2022-09-07
Supplement: s1 [file s1]

## DIAGNOSIS

|                 | Group 1                                    | Group 2                                     | Group 3                                    |
|-----------------|--------------------------------------------|---------------------------------------------|--------------------------------------------|
| DX femoral      | 6 normal<br>3 osteopenia<br>0 osteoporosis | 11 Normal<br>5 Osteopenia<br>0 Osteoporosis | 5 Normal<br>8 Osteopenia<br>0 Osteoporosis |
| DX lumbar spine | 0 Normal<br>9 Osteopenia<br>0 Osteoporosis | 2 Normal<br>10 Osteopenia<br>4 Osteoporosis | 1 Normal<br>8 Osteopenia<br>5 Osteoporosis |

0 Normal, 1 Osteopenia, 2 Osteoporosis

| GROUP | DX femoral                                  | DX spine                                    |
|-------|---------------------------------------------|---------------------------------------------|
| 1     | 0                                           | 1                                           |
| 1     | 1                                           | 1                                           |
| 1     | 0                                           | 1                                           |
| 1     | 2                                           | 1                                           |
| 1     | 2                                           | 1                                           |
| 1     | 0                                           | 1                                           |
| 1     | 0                                           | 1                                           |
| 1     | 0                                           | 1                                           |
| 1     | 0                                           | 1                                           |
| 1     | 6 normal<br>3 osteopenia<br>0 osteoporosis  | 0 Normal<br>9 Osteopenia<br>0 Osteoporosis  |
| 2     | 0                                           | 1                                           |
| 2     | 0                                           | 1                                           |
| 2     | 0                                           | 2                                           |
| 2     | 0                                           | 1                                           |
| 2     | 0                                           | 2                                           |
| 2     | 0                                           | 2                                           |
| 2     | 1                                           | 0                                           |
| 2     | 1                                           | 0                                           |
| 2     | 1                                           | 1                                           |
| 2     | 0                                           | 1                                           |
| 2     | 0                                           | 1                                           |
| 2     | 0                                           | 1                                           |
| 2     | 0                                           | 1                                           |
| 2     | 0                                           | 1                                           |
| 2     | 1                                           | 2                                           |
| 2     | 1                                           | 1                                           |
| 2     | 11 Normal<br>5 Osteopenia<br>0 Osteoporosis | 2 Normal<br>10 Osteopenia<br>4 Osteoporosis |
| 3     | 0                                           | 2                                           |
| 3     | 1                                           | 2                                           |
| 3     | 1                                           | 2                                           |

|   |                                            |                                            |
|---|--------------------------------------------|--------------------------------------------|
| 3 | 0                                          | 1                                          |
| 3 | 1                                          | 2                                          |
| 3 | 1                                          | 1                                          |
| 3 | 1                                          | 1                                          |
| 3 | 1                                          | 1                                          |
| 3 | 0                                          | 1                                          |
| 3 | 0                                          | 2                                          |
| 3 | 0                                          | 1                                          |
| 3 | 1                                          | 0                                          |
| 3 | 1                                          | 1                                          |
| 3 | 1                                          | 1                                          |
| 3 | 5 Normal<br>8 Osteopenia<br>0 Osteoporosis | 1 Normal<br>8 Osteopenia<br>5 Osteoporosis |
